# Supplementary material for: Concerted changes in transcriptional regulation of genes involved in DNA methylation, demethylation, and folate-mediated one-carbon metabolism pathways in the NCI-60 cancer cell line panel in response to cancer drug treatment
Source: PubMed Central journal article supplement (PMC4919895; doi:10.1186/s13148-016-0240-3), 2016-06-24
Supplement: 13148_2016_240_MOESM1_ESM.pdf [file 13148_2016_240_MOESM1_ESM.pdf]

**Table S1.** An overview of genes involved in DNA methylation, DNA demethylation, and one-carbon metabolism pathway that were analyzed in this study

| <b>Gene</b>        | <b>Full Name</b>                                              | <b>Role</b>                                                             | <b>Detailed Role</b>                                                                                                                      | <b>Reference<sup>a</sup></b> |
|--------------------|---------------------------------------------------------------|-------------------------------------------------------------------------|-------------------------------------------------------------------------------------------------------------------------------------------|------------------------------|
| <i>DNMT1</i>       | DNA methyltransferase 1                                       | Maintenance DNA methylation                                             | Maintenance DNA methyltransferase                                                                                                         | [1]                          |
| <i>DNMT3A</i>      | DNA methyltransferase 3A                                      | <i>De novo</i> DNA methylation                                          | <i>De novo</i> DNA methylation                                                                                                            | [1]                          |
| <i>DNMT3B</i>      | DNA methyltransferase 3B                                      | <i>De novo</i> DNA methylation                                          | <i>De novo</i> DNA methylation                                                                                                            | [1]                          |
| <i>DNMT3L</i>      | DNA methyltransferase 3-like protein                          | Stimulates enzymatic activity of DNMT3A                                 | Stimulation of enzymatic activity of DNMT3A                                                                                               | [1]                          |
| <i>TET3</i>        | Tet methylcytosine dioxygenase 3 (ten-eleven translocation-3) | DNA demethylation                                                       | Conversion of 5-mC to 5-hmC, 5-fC and 5-caC                                                                                               | [1, 2]                       |
| <i>AICDA (AID)</i> | Activation-induced cytidine deaminase                         | DNA demethylation                                                       | DNA demethylation via deamination of 5-mC or 5-hmC                                                                                        | [2-4]                        |
| <i>APOBEC1</i>     | Apolipoprotein B mRNA editing activity DNA deaminase 1        | DNA demethylation                                                       | DNA demethylation via deamination of 5-mC or 5-hmC                                                                                        | [2-4]                        |
| <i>APOBEC2</i>     | Apolipoprotein B mRNA editing activity DNA deaminase 2        | DNA demethylation                                                       | DNA demethylation                                                                                                                         | [2-4]                        |
| <i>APOBEC3A</i>    | Apolipoprotein B mRNA editing activity DNA deaminase 3A       | DNA demethylation                                                       | DNA demethylation, possibly via deamination of 5-mC or 5-hmC                                                                              | [2-4]                        |
| <i>APOBEC3C</i>    | Apolipoprotein B mRNA editing activity DNA deaminase 3C       | DNA demethylation                                                       | DNA demethylation, possibly via deamination of 5-mC or 5-hmC                                                                              | [2-4]                        |
| <i>TDG</i>         | Thymine-DNA glycosylase                                       | DNA demethylation                                                       | Excision of target bases including 5-fC and 5-caC to initiate BER pathway                                                                 | [2-4]                        |
| <i>GADD45A</i>     | Growth arrest and DNA damage 45 protein A                     | DNA demethylation, DNA repair                                           | DNA repair-mediated DNA demethylating factor that can reactivate genes which had been silenced by methylation; also involved in apoptosis | [5-8]                        |
| <i>IDH1</i>        | Isocitrate dehydrogenase 1                                    | Produces metabolites that interfere with TET-mediated DNA demethylation | IDH1 mutations lead to accumulation of 2-HG, TET inhibition and DNA hypermethylation                                                      | [2, 9-13]                    |
| <i>IDH2</i>        | Isocitrate dehydrogenase 2                                    | Produces metabolites that interfere with TET-mediated DNA demethylation | IDH2 mutations lead to accumulation of 2-HG, TET inhibition and DNA hypermethylation                                                      | [2, 9-13]                    |
| <i>MGMT</i>        | O(6)-methylguanine-DNA methyltransferase                      | DNA repair via demethylation of O <sup>6</sup> -meG                     | Demethylates O <sup>6</sup> -methylguanine lesions. MGMT also removes larger O <sup>6</sup> -alkyl                                        | [14]                         |

|                     |                                                               |                                                                                                                        |                                                                                                                                                                                                                                               |              |
|---------------------|---------------------------------------------------------------|------------------------------------------------------------------------------------------------------------------------|-----------------------------------------------------------------------------------------------------------------------------------------------------------------------------------------------------------------------------------------------|--------------|
|                     |                                                               |                                                                                                                        | adducts, and is thereby involved in resistance to nitrosourea-based anticancer drugs                                                                                                                                                          |              |
| <i>MBD1</i>         | Methyl-CpG-binding domain protein 1                           | Binding to methylated DNA, transcriptional modulation                                                                  | Transcriptional repression, DNA repair                                                                                                                                                                                                        | [1, 15-17]   |
| <i>MBD2</i>         | Methyl-CpG-binding domain protein 2                           | Transcriptional modulation, possible DNA demethylation, binding to methylated DNA                                      | Possible roles in transcriptional activation or repression, possible DNA demethylation                                                                                                                                                        | [1, 15, 18]  |
| <i>MBD3</i>         | Methyl-CpG-binding domain protein 3                           | Binding to 5-hmC                                                                                                       | Transcriptional repression                                                                                                                                                                                                                    | [1, 15]      |
| <i>MBD4 (MED1)</i>  | Methyl-CpG-binding domain protein 4                           | DNA repair                                                                                                             | DNA repair, possible roles in demethylation and maintenance DNA methylation                                                                                                                                                                   | [4, 16, 17]  |
| <i>MeCP2</i>        | Methyl-CpG-binding protein 2                                  | Binding to methylated DNA, transcriptional modulation, forms a complex with TET1                                       | Transcriptional repression, participation in TET1 complexes that lead to DNA demethylation                                                                                                                                                    | [1, 15]      |
| <i>PCNA</i>         | Proliferating cell nuclear antigen                            | DNA repair and replication; interactions with DNMT1 and TET1                                                           | Participates in DNA repair and replication. It may affect both DNA methylation via interaction with DNMT1 and DNA demethylation by forming a complex with TET1                                                                                | [11, 19]     |
| <i>USP7 (HAUSP)</i> | Herpes virus-associated ubiquitin specific protease           | Promotes DNA methylation via control of DNMT1                                                                          | Regulates DNMT1 abundance, stability and activity                                                                                                                                                                                             | [19, 20]     |
| <i>SMUG1</i>        | Single-strand-selective monofunctional uracil-DNA glycosylase | DNA demethylation, DNA repair                                                                                          | A member of the uracil-DNA glycosylase superfamily which is involved in DNA repair and DNA demethylation via the base excision repair (BER) pathway by participating in degradation of 5-hydroxymethyluracil (5-hmU) to unmethylated cytosine | [1, 2, 4]    |
| <i>MTHFR</i>        | 5, 10-methylenetetrahydrofolate reductase                     | OCM: regulation of folate metabolism                                                                                   | Catalyzes one of the central OCM reactions: the NADPH-dependent reduction of 5,10-methylenetetrahydrofolate (5,10-methyleneTHF) to 5-methylTHF                                                                                                | [21, 22]     |
| <i>MTHFD1</i>       | Methylenetetrahydrofolate dehydrogenase 1                     | OCM: Cytoplasmic roles as FTHF synthetase, CH <sup>+</sup> -THF cyclohydrolase, and CH <sub>2</sub> -THF dehydrogenase | Combines the functions of 10-formyl-THF synthetase, 5,10-methenyl-THF cyclohydrolase, and 5,10-methylene-THF                                                                                                                                  | [21, 23, 24] |

|                  |                                                                   |                                                                                             |                                                                                                                                                                                                                                                |              |
|------------------|-------------------------------------------------------------------|---------------------------------------------------------------------------------------------|------------------------------------------------------------------------------------------------------------------------------------------------------------------------------------------------------------------------------------------------|--------------|
|                  |                                                                   |                                                                                             | dehydrogenase that catalyze the reversible interconversion in the cytoplasm of THF into 5,10-methyleneTHF, via 10-formylTHF and 5,10-methenylTHF. These reactions produce 5,10-methyleneTHF, a cofactor required for thymidylate biosynthesis. |              |
| <i>MTR</i>       | Methionine synthase                                               | OCM: remethylation of Hcy to methionine                                                     | Remethylates Hcy to methionine                                                                                                                                                                                                                 | [23]         |
| <i>MTRR</i>      | 5-methyltetrahydrofolate-homocysteine methyltransferase reductase | OCM: generates functional methionine synthase                                               | Produces active methionine synthase, MTR                                                                                                                                                                                                       | [25, 26]     |
| <i>CBS</i>       | Cystathionine $\beta$ -synthase                                   | OCM: catalyzes the condensation of Hcy and Ser to cystathionine                             | Participates in the reactions that lead to the conversion of Hcy to cysteine, removing Hcy from the methylation cycle                                                                                                                          | [25]         |
| <i>TCN2</i>      | Transcobalamin II                                                 | OCM: vitamin B12 transport                                                                  | Transport protein for cobalamin                                                                                                                                                                                                                | [27]         |
| <i>SHMT1</i>     | Serine hydroxymethyl transferase 1                                | OCM: catalyzes the reversible conversion of Ser and THF to glycine and CH <sub>2</sub> -THF | Catalyzes the synthesis of 5-formylTHF from 5,10-methenylTHF in the cytoplasm and limits the availability of 5-methylTHF for Hcy remethylation and SAM biosynthesis; some reports also noted its possible activity in the nucleus              | [21]         |
| <i>TYMS (TS)</i> | Thymidylate synthase                                              | OCM: catalyzes the conversion of dUMP to dTMP                                               | Catalyzes the 5,10-methyleneTHF-dependent conversion of deoxyuridinemonophosphate (dUMP) into deoxythymidine monophosphate (dTMP), which serves as a precursor for DNA synthesis and is used DNA repair                                        | [21, 23]     |
| <i>DHFR</i>      | Dihydrofolate reductase                                           | OCM: conversion of dihydrofolate to THF                                                     | Catalyzed the reduction of dihydrofolate (DHF) to THF                                                                                                                                                                                          | [21, 23]     |
| <i>BHMT</i>      | Betaine-homocysteine methyltransferase                            | OCM: remethylation of Hcy to methionine                                                     | Participates in remethylation of Hcy to methionine via a reaction that is an alternative to the reactions regulated by MTR and MTRR                                                                                                            | [23, 28]     |
| <i>CTH</i>       | Cystathionase (cystathionine $\gamma$ -lyase)                     | OCM: conversion of cystathione to cysteine                                                  | Irreversible degradation of cystathionine, which is derived from Hcy, to cysteine, which contributes to removal of Hcy from                                                                                                                    | [25, 29, 30] |

|                                |                                                                                                  |                                                                                  |                                                                                                                                                                                                                                                                                                                                                                                                                            |          |
|--------------------------------|--------------------------------------------------------------------------------------------------|----------------------------------------------------------------------------------|----------------------------------------------------------------------------------------------------------------------------------------------------------------------------------------------------------------------------------------------------------------------------------------------------------------------------------------------------------------------------------------------------------------------------|----------|
|                                |                                                                                                  |                                                                                  | the methylation cycle                                                                                                                                                                                                                                                                                                                                                                                                      |          |
| <i>AHCY</i><br>( <i>SAHH</i> ) | S-adenosyl-L-homocysteine hydrolase                                                              | OCM: hydrolysis of SAH to adenosine and Hcy                                      | Catalyzes reversible hydrolysis of <i>S</i> -adenosyl- <i>L</i> -homocysteine to Hcy and adenosine                                                                                                                                                                                                                                                                                                                         | [30, 31] |
| <i>ALDH1L1</i>                 | 10-formyl tetrahydrofolate dehydrogenase (aldehyde dehydrogenase 1 family, member L1), cytosolic | OCM: irreversible oxidation of FTHF to THF and CO <sub>2</sub>                   | Encodes 10-formyltetrahydrofolate dehydrogenase (FDH), a major regulator of folate metabolism in the cytoplasm via NADP <sup>+</sup> -dependent irreversible oxidation of 10-formylTHF to THF. This process controls the availability of folate-bound carbon groups for biosynthetic processes, cell growth, and remethylation of Hcy, and it affects the availability of methyl groups for cellular methylation reactions | [32, 33] |
| <i>ATIC</i>                    | 5-aminoimidazole-4-carboxamide ribonucleotide formyltransferase                                  | OCM: purine biosynthesis                                                         | Purine biosynthesis                                                                                                                                                                                                                                                                                                                                                                                                        | [34]     |
| <i>GART</i>                    | Phosphoribosylglycinamide formyltransferase                                                      | OCM: purine biosynthesis                                                         | Purine biosynthesis                                                                                                                                                                                                                                                                                                                                                                                                        | [34]     |
| <i>MTHFS</i>                   | Methylenetetrahydrofolate synthase                                                               | OCM: purine biosynthesis                                                         | Encodes 5,10-methenylTHF synthetase which catalyzes the irreversible conversion of 5-formylTHF to 5,10-methenylTHF                                                                                                                                                                                                                                                                                                         | [21]     |
| <i>FTCD</i>                    | Glutamate formiminotransferase                                                                   | OCM: histidine catabolism                                                        | Provides one-carbon units resulting from histidine catabolism to the folate pool                                                                                                                                                                                                                                                                                                                                           | [21]     |
| <i>MAT1A</i>                   | L-methionine S-adenosyltransferase I, alpha                                                      | OCM: catalyzes SAM biosynthesis from methionine and ATP                          | Catalyzes biosynthesis of SAM, the major source of methyl groups for methylation reactions                                                                                                                                                                                                                                                                                                                                 | [35]     |
| <i>MAT2A</i>                   | L-methionine S-adenosyltransferase II, alpha                                                     | OCM: catalyzes SAM biosynthesis from methionine and ATP                          | Catalyzes biosynthesis of SAM                                                                                                                                                                                                                                                                                                                                                                                              | [35]     |
| <i>MAT2B</i>                   | L-methionine S-adenosyltransferase II, beta                                                      | OCM: catalyzes SAM biosynthesis from methionine and ATP                          | Catalyzes biosynthesis of SAM                                                                                                                                                                                                                                                                                                                                                                                              | [35]     |
| <i>NNMT</i>                    | Nicotinamide N-methyltransferase                                                                 | OCM: N-methylation of nicotinamide and other pyridines using SAM as methyl donor | Generates 1-methylnicotinamide in a reaction that consumes methyl units from SAM and reduces the ratio of SAM to Hcy                                                                                                                                                                                                                                                                                                       | [36, 37] |
| <i>PON1</i>                    | Paraoxonase 1                                                                                    | OCM: generates Hcy from homocysteine thiolactone                                 | Generates Hcy from homocysteine thiolactone                                                                                                                                                                                                                                                                                                                                                                                | [38]     |
| <i>SLC19A1</i>                 | Reduced folate carrier                                                                           | OCM: transport of folate and drugs                                               | Major transporter of folate and of antifolate                                                                                                                                                                                                                                                                                                                                                                              | [22, 25, |

|                                      |                                                  |                                                                                                                            |                                                                                                                                         |         |
|--------------------------------------|--------------------------------------------------|----------------------------------------------------------------------------------------------------------------------------|-----------------------------------------------------------------------------------------------------------------------------------------|---------|
| <i>(RFC1)</i>                        |                                                  | across cell membrane                                                                                                       | cancer drugs across cell membrane                                                                                                       | [39-42] |
| <i>FOLR1 (FR<math>\alpha</math>)</i> | Folate receptor 1                                | OCM: folate endocytosis                                                                                                    | Folate endocytosis                                                                                                                      | [40]    |
| <i>FOLR2 (FR<math>\beta</math>)</i>  | Folate receptor 2                                | OCM: folate endocytosis                                                                                                    | Folate endocytosis                                                                                                                      | [40]    |
| <i>FOLR3 (FR<math>\gamma</math>)</i> | Folate receptor 3                                | OCM: folate endocytosis                                                                                                    | Folate endocytosis                                                                                                                      | [40]    |
| <i>SHMT2</i>                         | Serine hydroxymethyl transferase 2               | OCM: mitochondrial folate metabolism for glycine synthesis                                                                 | Encodes the mitochondrial isozyme of serine hydroxymethyltransferase                                                                    | [43]    |
| <i>AMT</i>                           | Aminomethyltransferase                           | OCM: glycine cleavage system in mitochondria                                                                               | Involved in the glycine cleavage system in mitochondria that generates 5,10-methylene-THF                                               | [21]    |
| <i>MTHFD2</i>                        | Methylenetetrahydrofolate dehydrogenase 2        | OCM: mitochondrial NAD <sup>+</sup> -dependent CH <sub>2</sub> -THF dehydrogenase and CH <sup>+</sup> -THF cyclohydrolase  | Bifunctional mitochondrial NAD <sup>+</sup> -dependent 5,10-methylene-THF dehydrogenase /5,10-methenyl-THF cyclohydrolase               | [43]    |
| <i>MTHFD2L</i>                       | Methylenetetrahydrofolate dehydrogenase 2-like   | OCM: Mitochondrial dual redox cofactor-specific CH <sub>2</sub> -THF dehydrogenase and CH <sup>+</sup> -THF cyclohydrolase | 5,10-methyleneTHF dehydrogenase and 5,10-methenyl-THF cyclohydrolase in the mitochondrial OCM pathway                                   | [18]    |
| <i>PEMT</i>                          | Phosphatidylethanolamine-N-methyltransferase     | OCM: biosynthesis of phosphatidyl choline via interaction with SAM                                                         | Catalyzes the <i>de novo</i> synthesis of phosphatidylcholine using SAM as methyl donor                                                 | [30]    |
| <i>FOLH1 (GCPII, PSMA)</i>           | Folate hydrolase (glutamate carboxypeptidase II) | Conversion of dietary folate to folate and its intestinal absorption                                                       | Intestinal absorption of dietary folate and its conversion to folate                                                                    | [24]    |
| <i>ALDH2</i>                         | Aldehyde dehydrogenase 2 (mitochondrial)         | Metabolizes acetaldehyde, which may affect folate levels and inhibit DNA methylation                                       | Affects folate levels <i>in vivo</i> by producing high levels of acetaldehyde in alcohol metabolism and reducing the cleavage of folate | [44]    |

**2-HG**, 2-hydroxyglutarate; **5-hmU**, 5-hydroxymethyluracil; **5-caC**, 5-carboxylcytosine; **5-fC**, 5-formylcytosine; **5-hmC**, 5-hydroxymethylcytosine; **5-mC**, 5-methylcytosine; **BER**, base excision repair; **CH<sup>+</sup>-THF**, 5,10-methenyl-tetrahydrofolate; **CH<sub>2</sub>-THF**, 5,10-methylene-tetrahydrofolate; **FDH**, 10-formyltetrahydrofolate dehydrogenase; **FTHF**, 10-formyl-tetrahydrofolate; **Hcy**, homocysteine; **OCM**, folate-mediated one-carbon metabolism pathway; **SAH**, *S*-adenosylhomocysteine; **SAM**, *S*-adenosylmethionine; **Ser**, serine; **THF**, tetrahydrofolate

<sup>a</sup> The list of references for Table S1 is provided after Table S2.

**Table S2.** Numbers of genes with concerted expression and their empirical  $p$ -values for each treatment condition

| <b>Drug</b>   | <b>Concentration</b> | <b>Time (hours)</b> | <b>Number of genes with concerted expression</b> | <b><math>P</math>-value</b> |
|---------------|----------------------|---------------------|--------------------------------------------------|-----------------------------|
| 5-Azacytidine | High                 | 2                   | 3                                                | 0.6237                      |
| 5-Azacytidine | High                 | 6                   | 15                                               | 0.1694                      |
| 5-Azacytidine | High                 | 24                  | 36                                               | 0.3517                      |
| 5-Azacytidine | Low                  | 2                   | 2                                                | 0.4805                      |
| 5-Azacytidine | Low                  | 6                   | 8                                                | 0.0245**                    |
| 5-Azacytidine | Low                  | 24                  | 24                                               | 0.1042                      |
| Doxorubicin   | High                 | 2                   | 5                                                | 0.9307                      |
| Doxorubicin   | High                 | 6                   | 20                                               | 0.1309                      |
| Doxorubicin   | High                 | 24                  | 28                                               | 0.4328                      |
| Doxorubicin   | Low                  | 2                   | 1                                                | 0.6757                      |
| Doxorubicin   | Low                  | 6                   | 7                                                | 0.0205**                    |
| Doxorubicin   | Low                  | 24                  | 19                                               | 0.0034**                    |
| Vorinostat    | High                 | 2                   | 11                                               | 0.2011                      |
| Vorinostat    | High                 | 6                   | 24                                               | 0.5076                      |
| Vorinostat    | High                 | 24                  | 33                                               | 0.0076**                    |
| Vorinostat    | Low                  | 2                   | 9                                                | 0.3379                      |
| Vorinostat    | Low                  | 6                   | 23                                               | 0.3160                      |
| Vorinostat    | Low                  | 24                  | 24                                               | 0.0463**                    |
| Paclitaxel    | High                 | 2                   | 0                                                | 1.0000                      |
| Paclitaxel    | High                 | 6                   | 0                                                | 1.0000                      |
| Paclitaxel    | High                 | 24                  | 16                                               | 0.0001*                     |
| Paclitaxel    | Low                  | 2                   | 0                                                | 1.0000                      |
| Paclitaxel    | Low                  | 6                   | 1                                                | 0.4355                      |
| Paclitaxel    | Low                  | 24                  | 16                                               | 0.0000*                     |
| Cisplatin     | High                 | 2                   | 0                                                | 1.0000                      |
| Cisplatin     | High                 | 6                   | 10                                               | 0.1481                      |
| Cisplatin     | High                 | 24                  | 17                                               | 0.4196                      |
| Cisplatin     | Low                  | 2                   | 1                                                | 0.2785                      |
| Cisplatin     | Low                  | 6                   | 0                                                | 1.0000                      |
| Cisplatin     | Low                  | 24                  | 5                                                | 0.1270                      |

Empirical  $p$ -values were computed using 10,000 replications of random sampling of 56 genes from the 12,704 genes for which expression data were available in the TP Workbench. Genes were determined to have concerted expression when nearly all cell lines had a change in the same direction, with  $\leq 15$  cell lines showing a change in the opposite direction.

\*  $P < 0.00167$  (Bonferroni-adjusted  $p$ -value threshold for 5 agents, 2 concentrations, and 3 time points)

\*\*  $P < 0.05$

## References for Table S1

1. Pleyer L, Greil R. Digging deep into "dirty" drugs - modulation of the methylation machinery. *Drug Metab Rev.* 2015;47:252-79.
2. Shen L, Song CX, He C, Zhang Y. Mechanism and function of oxidative reversal of DNA and RNA methylation. *Annu Rev Biochem.* 2014;83:585-614.
3. Sadakierska-Chudy A, Kostrzewa RM, Filip M. A comprehensive view of the epigenetic landscape part I: DNA methylation, passive and active DNA demethylation pathways and histone variants. *Neurotox Res.* 2015;27:84-97.
4. Franchini DM, Petersen-Mahrt SK. AID and APOBEC deaminases: balancing DNA damage in epigenetics and immunity. *Epigenomics.* 2014;6:427-43.
5. Niehrs C, Schafer A. Active DNA demethylation by Gadd45 and DNA repair. *Trends Cell Biol.* 2012;22:220-7.
6. Schneider-Stock R, Diab-Assef M, Rohrbeck A, Foltzer-Jourdainne C, Boltze C, Hartig R et al. 5-Azacytidine is a potent inhibitor of DNA methyltransferase 3a and induces apoptosis in HCT-116 colon cancer cells via Gadd45- and p53-dependent mechanisms. *J Pharmacol Exp Ther.* 2005;312:525-36.
7. Nguyen AN, Hollenbach PW, Richard N, Luna-Moran A, Brady H, Heise C et al. Azacitidine and decitabine have different mechanisms of action in non-small cell lung cancer cell lines. *Lung Cancer: Targets and Therapy.* 2010;1:119-40.
8. Barreto G, Schafer A, Marhold J, Stach D, Swaminathan SK, Handa V et al. Gadd45a promotes epigenetic gene activation by repair-mediated DNA demethylation. *Nature.* 2007;445:671-5.
9. Shen H, Laird PW. Interplay between the cancer genome and epigenome. *Cell.* 2013;153:38-55.
10. Baubec T, Ivanek R, Lienert F, Schubeler D. Methylation-dependent and -independent genomic targeting principles of the MBD protein family. *Cell.* 2013;153:480-92.
11. Cartron PF, Nadaradjane A, Lepape F, Lalier L, Gardie B, Vallette FM. Identification of TET1 Partners That Control Its DNA-Demethylating Function. *Genes Cancer.* 2013;4:235-41.
12. Prensner JR, Chinnaiyan AM. Metabolism unhinged: IDH mutations in cancer. *Nat Med.* 2011;17:291-3.
13. Suetake I, Shinozaki F, Miyagawa J, Takeshima H, Tajima S. DNMT3L stimulates the DNA methylation activity of Dnmt3a and Dnmt3b through a direct interaction. *J Biol Chem.* 2004;279:27816-23.
14. Fahrer J, Kaina B. O6-methylguanine-DNA methyltransferase in the defense against N-nitroso compounds and colorectal cancer. *Carcinogenesis.* 2013;34:2435-42.
15. Das PM, Singal R. DNA methylation and cancer. *J Clin Oncol.* 2004;22:4632-42.
16. Xu J, Zhu W, Xu W, Cui X, Chen L, Ji S et al. Silencing of MBD1 reverses pancreatic cancer therapy resistance through inhibition of DNA damage repair. *Int J Oncol.* 2013;42:2046-52.
17. Prokhortchouk E, Hendrich B. Methyl-CpG binding proteins and cancer: are MeCpGs more important than MBDs? *Oncogene.* 2002;21:5394-9.
18. Cheishvili D, Chik F, Li CC, Bhattacharya B, Suderman M, Arakelian A et al. Synergistic effects of combined DNA methyltransferase inhibition and MBD2 depletion on breast cancer cells; MBD2 depletion blocks 5-aza-2'-deoxycytidine-triggered invasiveness. *Carcinogenesis.* 2014;35:2436-46.
19. Bronner C. Control of DNMT1 abundance in epigenetic inheritance by acetylation, ubiquitylation, and the histone code. *Sci Signal.* 2011;4:pe3.
20. Varol N, Konac E, Bilen CY. Does Wnt/beta-catenin pathway contribute to the stability of DNMT1 expression in urological cancer cell lines? *Exp Biol Med (Maywood).* 2014.
21. Fox JT, Stover PJ. Folate-mediated one-carbon metabolism. *Vitam Horm.* 2008;79:1-44.
22. Ulrich CM, Robien K, McLeod HL. Cancer pharmacogenetics: polymorphisms, pathways and beyond. *Nat Rev Cancer.* 2003;3:912-20.
23. Blom HJ, Smulders Y. Overview of homocysteine and folate metabolism. With special references to cardiovascular disease and neural tube defects. *J Inher Metab Dis.* 2011;34:75-81.

24. Hazra A, Wu K, Kraft P, Fuchs CS, Giovannucci EL, Hunter DJ. Twenty-four non-synonymous polymorphisms in the one-carbon metabolic pathway and risk of colorectal adenoma in the Nurses' Health Study. *Carcinogenesis*. 2007;28:1510-9.
25. Nazki FH, Sameer AS, Ganaie BA. Folate: metabolism, genes, polymorphisms and the associated diseases. *Gene*. 2014;533:11-20.
26. Mostowska A, Myka M, Lianeri M, Roszak A, Jagodzinski PP. Folate and choline metabolism gene variants and development of uterine cervical carcinoma. *Clin Biochem*. 2011;44:596-600.
27. Martinelli M, Scapoli L, Mattei G, Ugolini G, Montroni I, Zattoni D et al. A candidate gene study of one-carbon metabolism pathway genes and colorectal cancer risk. *Br J Nutr*. 2013;109:984-9.
28. Teng YW, Mehedint MG, Garrow TA, Zeisel SH. Deletion of betaine-homocysteine S-methyltransferase in mice perturbs choline and 1-carbon metabolism, resulting in fatty liver and hepatocellular carcinomas. *J Biol Chem*. 2011;286:36258-67.
29. Iacobazzi V, Castegna A, Infantino V, Andria G. Mitochondrial DNA methylation as a next-generation biomarker and diagnostic tool. *Mol Genet Metab*. 2013;110:25-34.
30. Tehlivets O, Malanovic N, Visram M, Pavkov-Keller T, Keller W. S-adenosyl-L-homocysteine hydrolase and methylation disorders: yeast as a model system. *Biochim Biophys Acta*. 2013;1832:204-15.
31. Li Q, Mao L, Wang R, Zhu L, Xue L. Overexpression of S-adenosylhomocysteine hydrolase (SAHH) in esophageal squamous cell carcinoma (ESCC) cell lines: effects on apoptosis, migration and adhesion of cells. *Mol Biol Rep*. 2014;41:2409-17.
32. Oleinik NV, Krupenko NI, Krupenko SA. Epigenetic Silencing of ALDH1L1, a Metabolic Regulator of Cellular Proliferation, in Cancers. *Genes Cancer*. 2011;2:130-9.
33. Stover PJ. Polymorphisms in 1-carbon metabolism, epigenetics and folate-related pathologies. *J Nutrigenet Nutrigenomics*. 2011;4:293-305.
34. Lane AN, Fan TW. Regulation of mammalian nucleotide metabolism and biosynthesis. *Nucleic Acids Res*. 2015;43:2466-85.
35. Murray B, Antonyuk SV, Marina A, Van Liempd SM, Lu SC, Mato JM et al. Structure and function study of the complex that synthesizes S-adenosylmethionine. *IUCrJ*. 2014;1:240-9.
36. Ulanovskaya OA, Zuhl AM, Cravatt BF. NNMT promotes epigenetic remodeling in cancer by creating a metabolic methylation sink. *Nat Chem Biol*. 2013;9:300-6.
37. Shlomi T, Rabinowitz JD. Metabolism: Cancer mistunes methylation. *Nat Chem Biol*. 2013;9:293-4.
38. Jakubowski H, Zhang L, Bardeguet A, Aviv A. Homocysteine thiolactone and protein homocysteinylation in human endothelial cells: implications for atherosclerosis. *Circ Res*. 2000;87:45-51.
39. Matherly LH, Wilson MR, Hou Z. The major facilitative folate transporters solute carrier 19A1 and solute carrier 46A1: biology and role in antifolate chemotherapy of cancer. *Drug Metab Dispos*. 2014;42:632-49.
40. Zhao R, Goldman ID. Folate and thiamine transporters mediated by facilitative carriers (SLC19A1-3 and SLC46A1) and folate receptors. *Mol Aspects Med*. 2013;34:373-85.
41. Hou Z, Matherly LH. Biology of the major facilitative folate transporters SLC19A1 and SLC46A1. *Curr Top Membr*. 2014;73:175-204.
42. Hagner N, Joerger M. Cancer chemotherapy: targeting folic acid synthesis. *Cancer Manag Res*. 2010;2:293-301.
43. Shin M, Bryant JD, Momb J, Appling DR. Mitochondrial MTHFD2L is a dual redox cofactor-specific methylenetetrahydrofolate dehydrogenase/methenyltetrahydrofolate cyclohydrolase expressed in both adult and embryonic tissues. *J Biol Chem*. 2014;289:15507-17.
44. Otani T, Iwasaki M, Hanaoka T, Kobayashi M, Ishihara J, Natsukawa S et al. Folate, vitamin B6, vitamin B12, and vitamin B2 intake, genetic polymorphisms of related enzymes, and risk of colorectal cancer in a hospital-based case-control study in Japan. *Nutr Cancer*. 2005;53:42-50.
